# Supplementary material
Source: PubMed Central journal article supplement (PMC5856497)
Supplement: pnas.201703643SI.pdf [file pnas.201703643SI.pdf]

# Supporting Information

Goldstein et al. 10.1073/pnas.1703643115

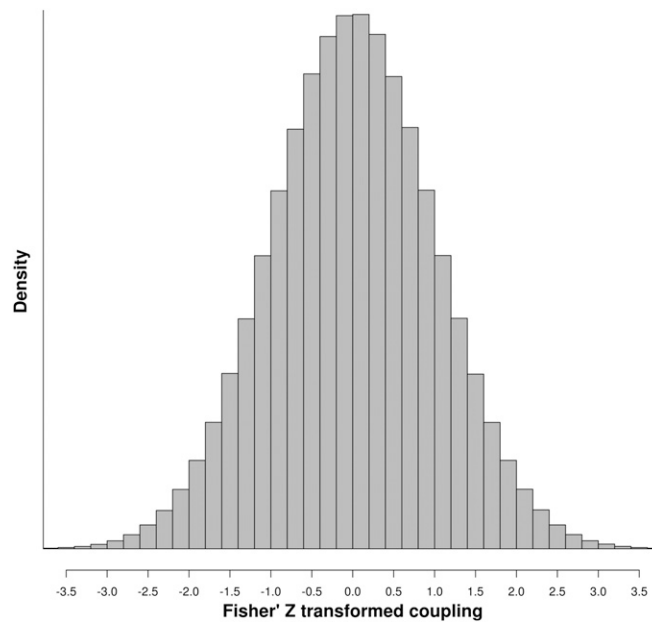

Fig. S1. Distribution of circular correlation coefficient normalized by Fisher's Z transformation.



**Table S1. Cont.**

| Female | Male | <i>F</i> value | <i>P</i> value |
|--------|------|----------------|----------------|
| P8     | PO9  | 16.736         | 5.13E-11       |
| P8     | Oz   | 6.339          | 6.43E-03       |
| P8     | O2   | 8.592          | 1.61E-04       |
| P8     | PO10 | 12.78          | 7.72E-08       |

The first step of the interbrain analysis tested hypothesis  $H_1$  that at least a single condition of interest (partner touch–no-pain, partner no-touch–no-pain, partner touch–pain, and partner no-touch–pain) would demonstrate higher interpartner coupling than the baseline no-pain-alone condition for each combination of interpartner electrodes. The first two columns represent the electrodes that took part in the brain-to-brain coupling, and the last two columns show the statistics and the significance of the test.

**Table S2. Second step of interbrain analysis**

| Contrast                 | Female | Male | Estimate | SE    | T value | FDR-adjusted P value | Power |
|--------------------------|--------|------|----------|-------|---------|----------------------|-------|
| Pain–no-touch vs. npa    | F4     | F7   | 0.051    | 0.010 | 5.21    | 1.48E-05             | 0.92  |
| Pain–no-touch vs. npa    | F4     | F3   | 0.063    | 0.012 | 5.19    | 1.48E-05             | 0.90  |
| Pain–no-touch vs. npa    | F4     | Fz   | 0.064    | 0.012 | 5.19    | 1.48E-05             | 0.89  |
| Pain–no-touch vs. npa    | FC5    | F3   | 0.052    | 0.011 | 4.70    | 1.16E-04             | 0.86  |
| Pain–no-touch vs. npa    | FC5    | FC5  | 0.042    | 0.010 | 4.09    | 1.39E-03             | 0.82  |
| Pain–touch vs. npa       | FC5    | FC1  | 0.081    | 0.012 | 6.97    | 9.63E-10             | 0.94  |
| Pain–touch vs. npa       | FC5    | FC2  | 0.062    | 0.009 | 7.02    | 9.63E-10             | 0.96  |
| Pain–touch vs. npa       | FC5    | Cz   | 0.070    | 0.010 | 6.85    | 1.29E-09             | 0.93  |
| Pain–touch vs. npa       | FC1    | FC1  | 0.069    | 0.012 | 5.90    | 3.75E-07             | 0.91  |
| Pain–touch vs. npa       | FC1    | FC2  | 0.068    | 0.012 | 5.90    | 3.75E-07             | 0.91  |
| Pain–touch vs. npa       | FC1    | FC6  | 0.069    | 0.012 | 5.90    | 3.75E-07             | 0.89  |
| Pain–touch vs. npa       | FC1    | Cz   | 0.076    | 0.011 | 7.14    | 8.34E-10             | 0.93  |
| Pain–touch vs. npa       | FC1    | C4   | 0.077    | 0.011 | 7.15    | 8.34E-10             | 0.93  |
| Pain–touch vs. npa       | FC1    | CP1  | 0.035    | 0.009 | 3.81    | 4.41E-03             | 0.77  |
| Pain–touch vs. npa       | FC1    | CP2  | 0.056    | 0.009 | 6.41    | 2.23E-08             | 0.89  |
| Pain–touch vs. npa       | FC1    | CP6  | 0.045    | 0.011 | 3.96    | 2.37E-03             | 0.81  |
| Pain–touch vs. npa       | FC1    | P4   | 0.045    | 0.009 | 4.75    | 9.41E-05             | 0.85  |
| Pain–touch vs. npa       | FC2    | FC2  | 0.068    | 0.010 | 6.87    | 1.27E-09             | 0.91  |
| Pain–touch vs. npa       | FC2    | Cz   | 0.063    | 0.011 | 5.58    | 2.05E-06             | 0.87  |
| Pain–touch vs. npa       | FC6    | F8   | 0.037    | 0.009 | 4.12    | 1.27E-03             | 0.83  |
| Pain–touch vs. npa       | FC6    | FC1  | 0.067    | 0.012 | 5.69    | 1.15E-06             | 0.86  |
| Pain–touch vs. npa       | FC6    | FC2  | 0.068    | 0.012 | 5.69    | 1.15E-06             | 0.88  |
| Pain–touch vs. npa       | FC6    | Cz   | 0.069    | 0.010 | 6.88    | 1.27E-09             | 0.92  |
| Pain–touch vs. npa       | FC6    | C4   | 0.044    | 0.010 | 4.22    | 8.94E-04             | 0.87  |
| Pain–touch vs. npa       | FC6    | T8   | 0.043    | 0.010 | 4.21    | 8.94E-04             | 0.88  |
| Pain–touch vs. npa       | FC6    | TP9  | 0.042    | 0.010 | 4.20    | 8.94E-04             | 0.87  |
| Pain–touch vs. npa       | FC6    | CP5  | 0.043    | 0.010 | 4.21    | 8.94E-04             | 0.87  |
| Pain–touch vs. npa       | FC6    | CP2  | 0.041    | 0.010 | 4.28    | 7.37E-04             | 0.88  |
| No-pain–touch vs. npa    | C3     | FC1  | 0.057    | 0.011 | 5.12    | 1.87E-05             | 0.89  |
| No-pain–touch vs. npa    | C3     | FC2  | 0.057    | 0.011 | 5.12    | 1.87E-05             | 0.89  |
| No-pain–touch vs. npa    | C3     | C3   | 0.047    | 0.010 | 4.90    | 5.52E-05             | 0.86  |
| No-pain–touch vs. npa    | C3     | Cz   | 0.047    | 0.010 | 4.90    | 5.52E-05             | 0.87  |
| No-pain–touch vs. npa    | Cz     | FC1  | 0.055    | 0.013 | 4.38    | 4.72E-04             | 0.85  |
| No-pain–touch vs. npa    | Cz     | FC2  | 0.056    | 0.013 | 4.38    | 4.72E-04             | 0.85  |
| No-pain–touch vs. npa    | C4     | FC1  | 0.046    | 0.009 | 4.81    | 7.94E-05             | 0.86  |
| No-pain–touch vs. npa    | C4     | FC2  | 0.053    | 0.011 | 4.81    | 7.94E-05             | 0.83  |
| No-pain–touch vs. npa    | C4     | FC6  | 0.054    | 0.011 | 4.82    | 7.94E-05             | 0.83  |
| No-pain–touch vs. npa    | C4     | C3   | 0.052    | 0.010 | 5.36    | 6.89E-06             | 0.86  |
| No-pain–no-touch vs. npa | P8     | C4   | 0.042    | 0.009 | 4.76    | 9.16E-05             | 0.82  |
| No-pain–no-touch vs. npa | P8     | T8   | 0.043    | 0.009 | 4.77    | 9.16E-05             | 0.84  |
| No-pain–no-touch vs. npa | P8     | CP2  | 0.042    | 0.010 | 4.14    | 1.18E-03             | 0.80  |
| No-pain–no-touch vs. npa | P8     | CP6  | 0.057    | 0.009 | 6.36    | 2.89E-08             | 0.94  |
| No-pain–no-touch vs. npa | P8     | TP10 | 0.043    | 0.010 | 4.19    | 9.67E-04             | 0.86  |
| No-pain–no-touch vs. npa | P8     | Pz   | 0.041    | 0.009 | 4.42    | 4.21E-04             | 0.82  |
| No-pain–no-touch vs. npa | P8     | P4   | 0.061    | 0.009 | 6.87    | 1.27E-09             | 0.93  |
| No-pain–no-touch vs. npa | P8     | P8   | 0.064    | 0.009 | 6.97    | 9.63E-10             | 0.95  |
| No-pain–no-touch vs. npa | P8     | PO9  | 0.065    | 0.009 | 6.98    | 9.63E-10             | 0.88  |
| No-pain–no-touch vs. npa | P8     | Oz   | 0.042    | 0.009 | 4.45    | 3.84E-04             | 0.81  |
| No-pain–no-touch vs. npa | P8     | O2   | 0.050    | 0.010 | 5.15    | 1.73E-05             | 0.90  |
| No-pain–no-touch vs. npa | P8     | PO10 | 0.063    | 0.011 | 5.95    | 3.40E-07             | 0.94  |

Based on the first step, only significant electrodes combinations were analyzed in the second step. Each of the four conditions of interest was compared separately to the baseline no-pain-alone condition, describing the interpartner connectivity network during touch with/without pain and for partner copresence with/without pain. “npa” represents the no-pain-alone condition.

**Table S3. Third step of interbrain analysis**

| Contrasts to pain–touch condition | Female | Male | Estimate | SE    | T value | FDR-adjusted P value | Power |
|-----------------------------------|--------|------|----------|-------|---------|----------------------|-------|
| No-pain–no-touch                  | FC5    | FC1  | 0.074    | 0.011 | 6.92    | 5.78E-11             | 0.89  |
| No-pain–no-touch                  | FC5    | FC2  | 0.054    | 0.009 | 6.01    | 1.78E-08             | 0.85  |
| No-pain–no-touch                  | FC5    | Cz   | 0.068    | 0.009 | 7.34    | 3.27E-12             | 0.94  |
| No-pain–no-touch                  | FC1    | FC1  | 0.077    | 0.010 | 7.48    | 1.31E-12             | 0.96  |
| No-pain–no-touch                  | FC1    | FC2  | 0.076    | 0.010 | 7.47    | 1.30E-12             | 0.96  |
| No-pain–no-touch                  | FC1    | FC6  | 0.075    | 0.010 | 7.46    | 1.29E-12             | 0.95  |
| No-pain–no-touch                  | FC1    | Cz   | 0.081    | 0.009 | 8.74    | 2.42E-16             | 0.97  |
| No-pain–no-touch                  | FC1    | C4   | 0.081    | 0.009 | 8.73    | 2.41E-16             | 0.96  |
| No-pain–no-touch                  | FC1    | CP1  | 0.036    | 0.011 | 3.41    | 3.56E-03             | 0.81  |
| No-pain–no-touch                  | FC1    | CP2  | 0.043    | 0.009 | 4.91    | 7.41E-06             | 0.85  |
| No-pain–no-touch                  | FC1    | CP6  | 0.040    | 0.010 | 4.12    | 2.36E-04             | 0.83  |
| No-pain–no-touch                  | FC1    | P4   | 0.035    | 0.009 | 3.95    | 4.62E-04             | 0.82  |
| No-pain–no-touch                  | FC2    | FC2  | 0.078    | 0.011 | 7.06    | 2.33E-11             | 0.94  |
| No-pain–no-touch                  | FC2    | Cz   | 0.059    | 0.011 | 5.32    | 8.85E-07             | 0.90  |
| No-pain–no-touch                  | FC6    | F8   | 0.040    | 0.009 | 4.30    | 1.18E-04             | 0.86  |
| No-pain–no-touch                  | FC6    | FC1  | 0.076    | 0.010 | 8.01    | 3.58E-14             | 0.94  |
| No-pain–no-touch                  | FC6    | FC2  | 0.076    | 0.010 | 8.02    | 3.59E-14             | 0.94  |
| No-pain–no-touch                  | FC6    | Cz   | 0.066    | 0.009 | 7.24    | 6.72E-12             | 0.91  |
| No-pain–no-touch                  | FC6    | C4   | 0.042    | 0.010 | 4.14    | 2.19E-04             | 0.84  |
| No-pain–no-touch                  | FC6    | T8   | 0.043    | 0.010 | 4.15    | 2.120E-04            | 0.84  |
| No-pain–no-touch                  | FC6    | TP9  | 0.042    | 0.010 | 4.14    | 2.19E-04             | 0.84  |
| No-pain–no-touch                  | FC6    | CP5  | 0.042    | 0.010 | 4.14    | 2.19E-04             | 0.85  |
| No-pain–no-touch                  | FC6    | CP2  | 0.036    | 0.012 | 2.97    | 1.48E-02             | 0.79  |
| No-pain–touch                     | FC5    | FC1  | 0.071    | 0.010 | 6.90    | 6.69E-11             | 0.89  |
| No-pain–touch                     | FC5    | FC2  | 0.068    | 0.010 | 6.68    | 2.85E-10             | 0.88  |
| No-pain–touch                     | FC5    | Cz   | 0.070    | 0.011 | 6.44    | 1.35E-09             | 0.86  |
| No-pain–touch                     | FC1    | FC1  | 0.082    | 0.009 | 9.19    | 6.71E-18             | 0.99  |
| No-pain–touch                     | FC1    | FC2  | 0.081    | 0.009 | 9.17    | 6.72E-18             | 0.98  |
| No-pain–touch                     | FC1    | FC6  | 0.082    | 0.009 | 9.19    | 6.71E-18             | 0.99  |
| No-pain–touch                     | FC1    | Cz   | 0.072    | 0.009 | 7.92    | 5.48E-14             | 0.96  |
| No-pain–touch                     | FC1    | C4   | 0.072    | 0.009 | 7.92    | 5.48E-14             | 0.96  |
| No-pain–touch                     | FC1    | CP1  | 0.043    | 0.009 | 4.73    | 1.83E-05             | 0.83  |
| No-pain–touch                     | FC1    | CP2  | 0.053    | 0.009 | 6.11    | 1.05E-08             | 0.89  |
| No-pain–touch                     | FC1    | CP6  | 0.044    | 0.010 | 4.47    | 5.70E-05             | 0.84  |
| No-pain–touch                     | FC1    | P4   | 0.040    | 0.009 | 4.49    | 5.34E-05             | 0.83  |
| No-pain–touch                     | FC2    | FC2  | 0.064    | 0.012 | 5.47    | 3.88E-07             | 0.87  |
| No-pain–touch                     | FC2    | Cz   | 0.078    | 0.010 | 7.97    | 4.60E-14             | 0.95  |
| No-pain–touch                     | FC6    | FC1  | 0.081    | 0.010 | 8.38    | 2.17E-15             | 0.97  |
| No-pain–touch                     | FC6    | FC2  | 0.081    | 0.010 | 8.38    | 2.17E-15             | 0.97  |
| No-pain–touch                     | FC6    | Cz   | 0.076    | 0.009 | 8.51    | 1.32E-15             | 0.96  |
| No-pain–touch                     | FC6    | C4   | 0.034    | 0.009 | 3.76    | 9.34E-04             | 0.82  |
| No-pain–touch                     | FC6    | T8   | 0.033    | 0.009 | 3.75    | 9.33E-04             | 0.81  |
| No-pain–touch                     | FC6    | TP9  | 0.034    | 0.009 | 3.76    | 9.34E-04             | 0.81  |
| No-pain–touch                     | FC6    | CP5  | 0.033    | 0.009 | 3.75    | 9.33E-04             | 0.82  |
| No-pain–touch                     | FC6    | CP2  | 0.040    | 0.009 | 4.41    | 7.49E-05             | 0.84  |
| Pain–no-touch                     | FC5    | FC1  | 0.067    | 0.012 | 5.68    | 1.19E-07             | 0.87  |
| Pain–no-touch                     | FC5    | FC2  | 0.056    | 0.009 | 6.14    | 8.74E-09             | 0.89  |
| Pain–no-touch                     | FC5    | Cz   | 0.083    | 0.011 | 7.61    | 5.12E-13             | 0.93  |
| Pain–no-touch                     | FC1    | FC1  | 0.091    | 0.011 | 8.38    | 2.17E-15             | 0.96  |
| Pain–no-touch                     | FC1    | FC2  | 0.092    | 0.011 | 8.39    | 2.18E-15             | 0.96  |
| Pain–no-touch                     | FC1    | FC6  | 0.091    | 0.011 | 8.38    | 2.17E-15             | 0.96  |
| Pain–no-touch                     | FC1    | Cz   | 0.076    | 0.010 | 7.65    | 3.95E-13             | 0.91  |
| Pain–no-touch                     | FC1    | C4   | 0.076    | 0.010 | 7.65    | 3.95E-13             | 0.91  |
| Pain–no-touch                     | FC1    | CP1  | 0.044    | 0.010 | 4.38    | 8.40E-05             | 0.84  |
| Pain–no-touch                     | FC1    | CP2  | 0.058    | 0.009 | 6.38    | 1.96E-09             | 0.89  |
| Pain–no-touch                     | FC1    | CP6  | 0.048    | 0.012 | 4.14    | 2.19E-04             | 0.83  |
| Pain–no-touch                     | FC1    | P4   | 0.048    | 0.010 | 4.62    | 2.99E-05             | 0.81  |
| Pain–no-touch                     | FC2    | FC2  | 0.074    | 0.011 | 7.04    | 2.60E-11             | 0.86  |
| Pain–no-touch                     | FC2    | Cz   | 0.077    | 0.009 | 8.10    | 1.97E-14             | 0.92  |
| Pain–no-touch                     | FC6    | FC1  | 0.075    | 0.012 | 6.02    | 1.65E-08             | 0.85  |
| Pain–no-touch                     | FC6    | FC2  | 0.075    | 0.012 | 6.02    | 1.65E-08             | 0.85  |
| Pain–no-touch                     | FC6    | Cz   | 0.080    | 0.010 | 7.95    | 5.05E-14             | 0.93  |

**Table S3. Cont.**

| Contrasts to pain–touch condition | Female | Male | Estimate | SE    | T value | FDR-adjusted P value | Power |
|-----------------------------------|--------|------|----------|-------|---------|----------------------|-------|
| Pain–no-touch                     | FC6    | C4   | 0.038    | 0.012 | 3.15    | 8.30E-03             | 0.80  |
| Pain–no-touch                     | FC6    | T8   | 0.037    | 0.012 | 3.14    | 8.29E-03             | 0.78  |
| Pain–no-touch                     | FC6    | TP9  | 0.037    | 0.012 | 3.14    | 8.29E-03             | 0.80  |
| Pain–no-touch                     | FC6    | CP5  | 0.038    | 0.012 | 3.15    | 8.30E-03             | 0.80  |
| Pain–no-touch                     | FC6    | CP2  | 0.048    | 0.012 | 4.10    | 2.49E-04             | 0.83  |
| No-pain-alone                     | FC5    | FC1  | 0.081    | 0.012 | 6.97    | 9.63E-10             | 0.89  |
| No-pain-alone                     | FC5    | FC2  | 0.062    | 0.009 | 7.02    | 9.63E-10             | 0.90  |
| No-pain-alone                     | FC5    | Cz   | 0.070    | 0.010 | 6.85    | 1.29E-09             | 0.89  |
| No-pain-alone                     | FC1    | FC1  | 0.068    | 0.012 | 5.89    | 3.74E-07             | 0.85  |
| No-pain-alone                     | FC1    | FC2  | 0.069    | 0.012 | 5.90    | 3.75E-07             | 0.84  |
| No-pain-alone                     | FC1    | FC6  | 0.069    | 0.012 | 5.90    | 3.75E-07             | 0.84  |
| No-pain-alone                     | FC1    | Cz   | 0.076    | 0.011 | 7.14    | 8.34E-10             | 0.91  |
| No-pain-alone                     | FC1    | C4   | 0.076    | 0.011 | 7.14    | 8.34E-10             | 0.90  |
| No-pain-alone                     | FC1    | CP1  | 0.035    | 0.009 | 3.81    | 4.41E-03             | 0.83  |
| No-pain-alone                     | FC1    | CP2  | 0.056    | 0.009 | 6.41    | 2.23E-08             | 0.87  |
| No-pain-alone                     | FC1    | CP6  | 0.045    | 0.011 | 3.96    | 2.37E-03             | 0.82  |
| No-pain-alone                     | FC1    | P4   | 0.045    | 0.009 | 4.75    | 9.41E-05             | 0.86  |
| No-pain-alone                     | FC2    | FC2  | 0.068    | 0.010 | 6.87    | 1.27E-09             | 0.91  |
| No-pain-alone                     | FC2    | Cz   | 0.063    | 0.011 | 5.58    | 2.05E-06             | 0.88  |
| No-pain-alone                     | FC6    | F8   | 0.037    | 0.009 | 4.12    | 1.27E-03             | 0.83  |
| No-pain-alone                     | FC6    | FC1  | 0.067    | 0.012 | 5.69    | 1.15E-06             | 0.88  |
| No-pain-alone                     | FC6    | FC2  | 0.067    | 0.012 | 5.69    | 1.15E-06             | 0.88  |
| No-pain-alone                     | FC6    | Cz   | 0.069    | 0.010 | 6.88    | 1.27E-09             | 0.93  |
| No-pain-alone                     | FC6    | C4   | 0.042    | 0.010 | 4.20    | 8.95E-04             | 0.83  |
| No-pain-alone                     | FC6    | T8   | 0.043    | 0.010 | 4.21    | 8.94E-04             | 0.83  |
| No-pain-alone                     | FC6    | TP9  | 0.044    | 0.010 | 4.22    | 8.93E-04             | 0.84  |
| No-pain-alone                     | FC6    | CP5  | 0.043    | 0.010 | 4.21    | 8.94E-04             | 0.83  |
| No-pain-alone                     | FC6    | CP2  | 0.041    | 0.010 | 4.28    | 7.37E-04             | 0.85  |

The third step was planned to identify a unique interpartner connectivity network during touch and pain. The following interbrain electrode pairs showed higher brain-to-brain coupling in the partner touch–pain conditions compared with each of the control conditions.
